# Supplementary material for: Potential of Cellulose Functionalized with Carboxylic Acid as Biosorbent for the Removal of Cationic Dyes in Aqueous Solution
Source: PubMed Central journal article supplement (PMC6017135; doi:10.3390/molecules23040743), 2018-03-23
Supplement: molecules-23-00743-s001.pdf [file molecules-23-00743-s001.pdf]

## Supplementary material

# Potential of Cellulose Functionalized with Carboxylic Acid as Biosorbent for the Removal of Cationic Dyes in Aqueous Solution

Lucinaldo dos Santos Silva<sup>1</sup>, Jhonatam de Oliveira Carvalho<sup>1</sup>, Roosevelt Delano Sousa Bezerra<sup>2</sup>, Mateus Soares da Silva<sup>3</sup>, Francisco José Lustosa Ferreira<sup>3</sup>, Josy Anteveli Osajima<sup>3</sup> and Edson Cavalcanti da Silva Filho<sup>3,\*</sup>

<sup>1</sup> Açailândia Campus, Federal Institute of Maranhão, IFMA, Açailândia, MA 65930-000, Brazil; ssdlucinaldo@gmail.com (L.d.S.S.); jhonatam.carvalho@ifma.edu.br (J.d.O.C.)

<sup>2</sup> Teresina-Central Campus, Federal Institute of Piauí, IFPI, Teresina, PI 64000-040, Brazil; rooseveltdsb@ifpi.edu.br

<sup>3</sup> Interdisciplinary Laboratory for Advanced Materials—LIMAV, UFPI, Teresina, PI 64049-550, Brazil; mateusufpi@gmail.com (M.S.d.S.); franciscojufpi@gmail.com (F.J.L.F.); josy\_osajima@yahoo.com.br (J.A.O.)

\* Correspondence: edsonfilho@ufpi.edu.br; Tel.: +55-86-3221-5710

### Contents of the supplementary material:

|                                                                                                                                                                      |           |
|----------------------------------------------------------------------------------------------------------------------------------------------------------------------|-----------|
| (i) Distribution of CV microspecies under different pHs. Scheme of adsorption process of CV in the (ii) Cel and (iii) PhCel under different pHs.....                 | Figure S1 |
| (i) Distribution of MB microspecies under different pHs. Scheme of adsorption process of MB in the (ii) Cel and (iii) PhCel under different pHs.....                 | Figure S2 |
| Effect of contact time on the adsorption of CV (a and b) and MB (c and d) onto Cel (- ■ -) or PhCel (- ● -) and the nonlinear adjustments of kinetic models.....     | Figure S3 |
| Effect of CV concentration on the adsorption process in the Cel (a–c) or PhCel (d–f) in different temperatures and the nonlinear adjustments of Isotherm models..... | Figure S4 |
| Effect of MB concentration on the adsorption process in the Cel (a–c) or PhCel (d–f) in different temperatures and the nonlinear adjustments of Isotherm models..... | Figure S5 |

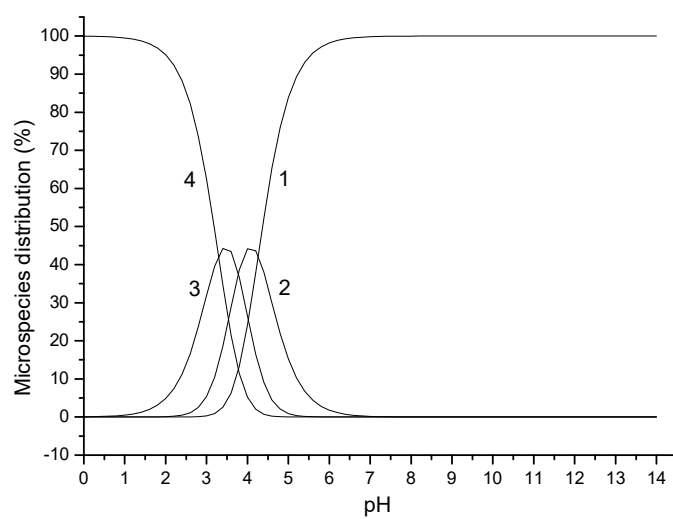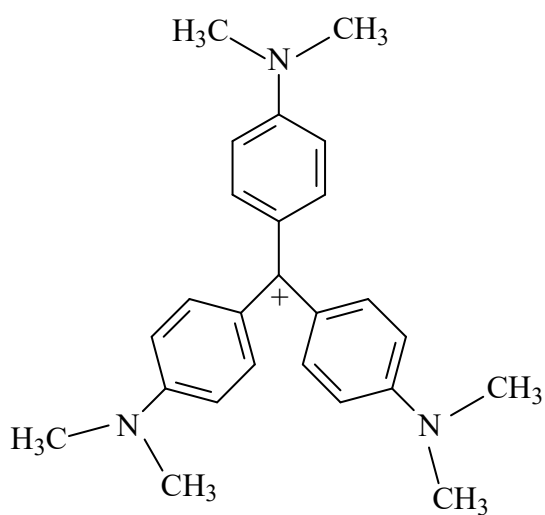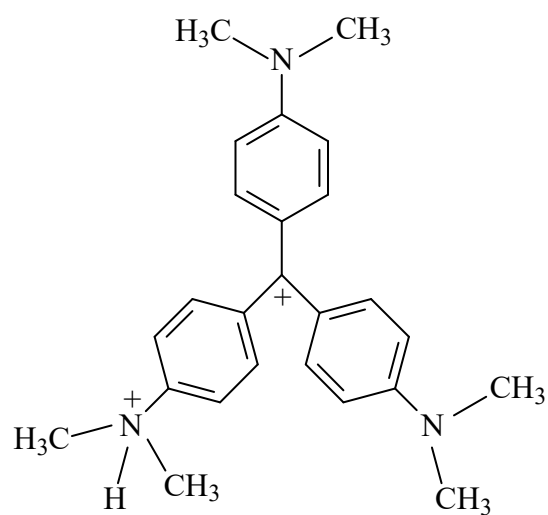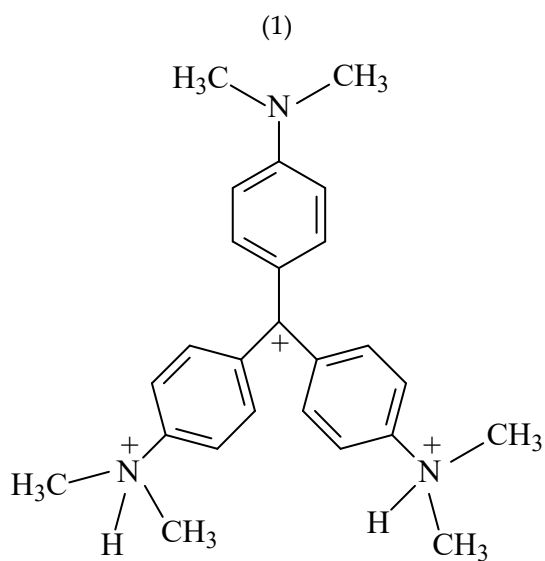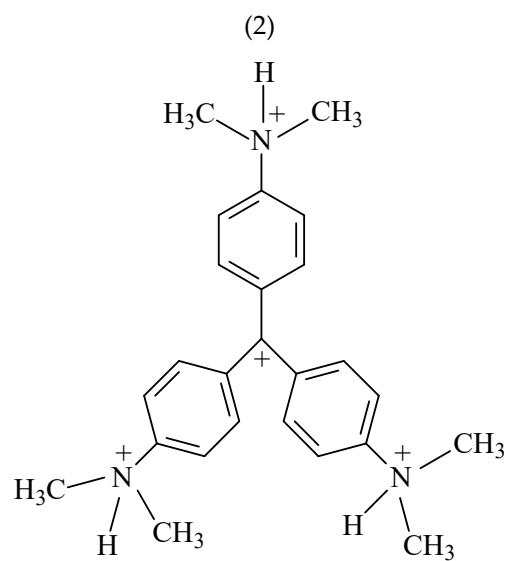

(i)

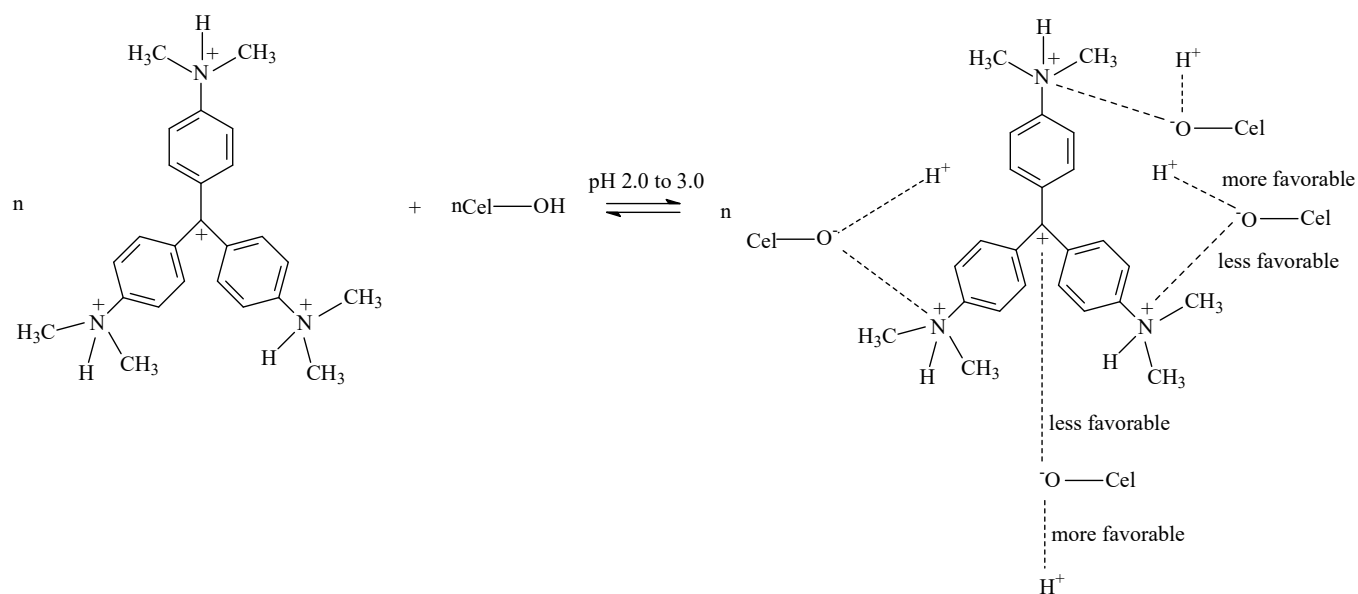

(1)

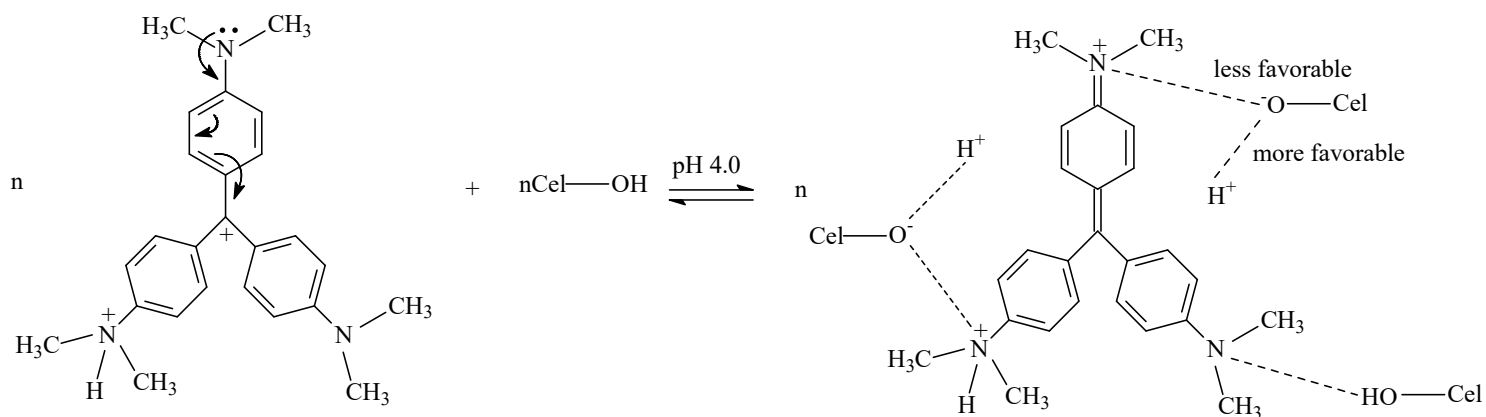

(2)

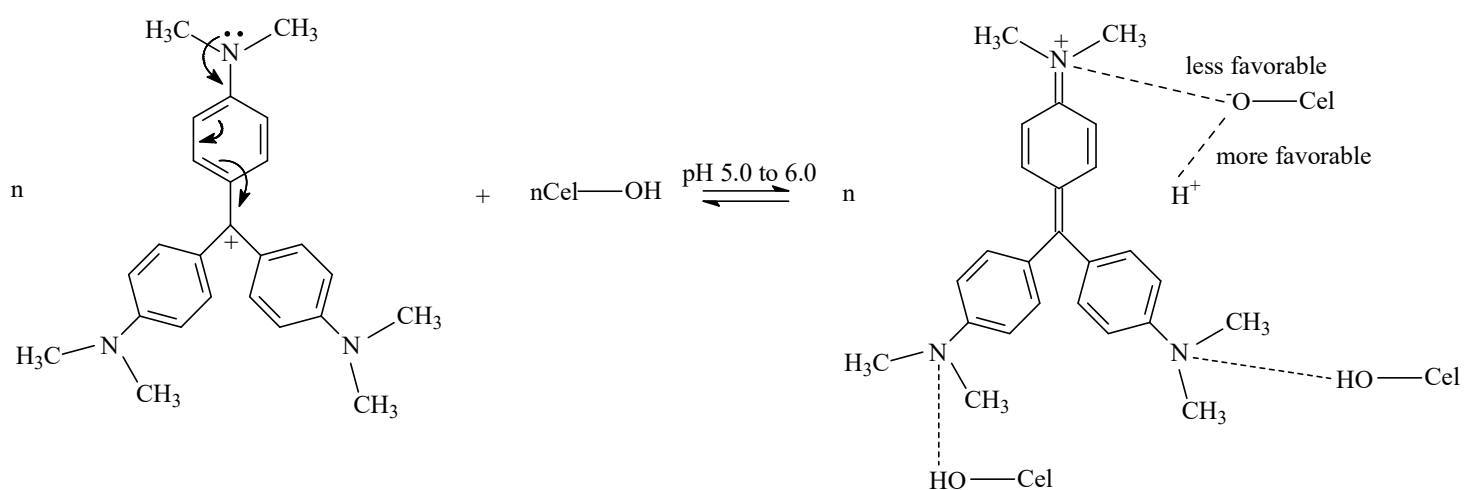

(3)

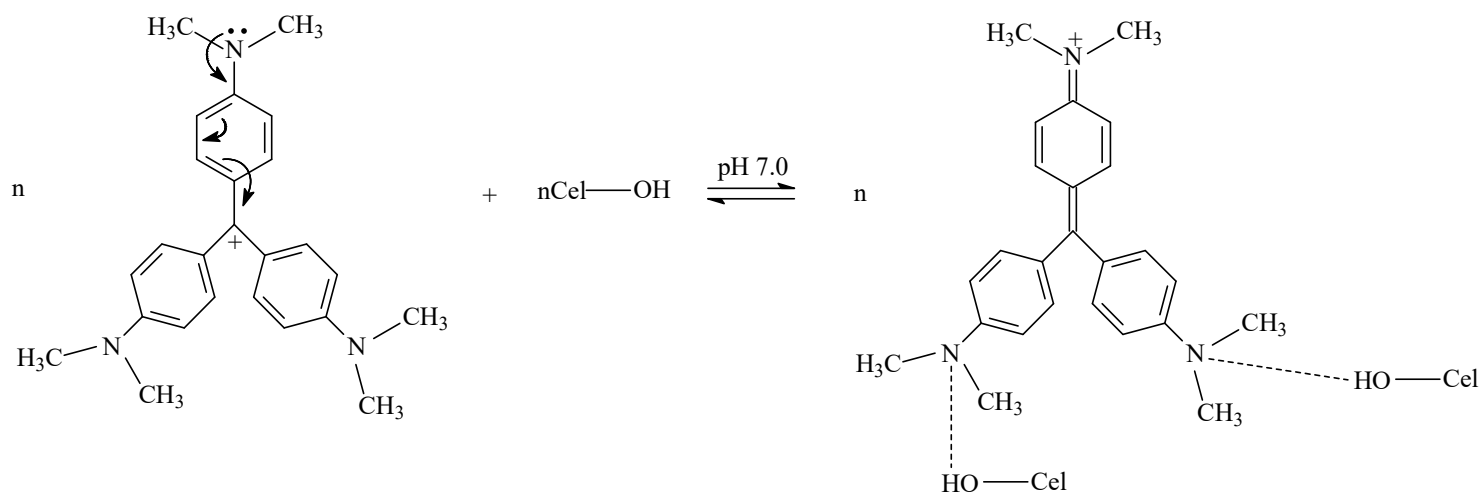

(4)

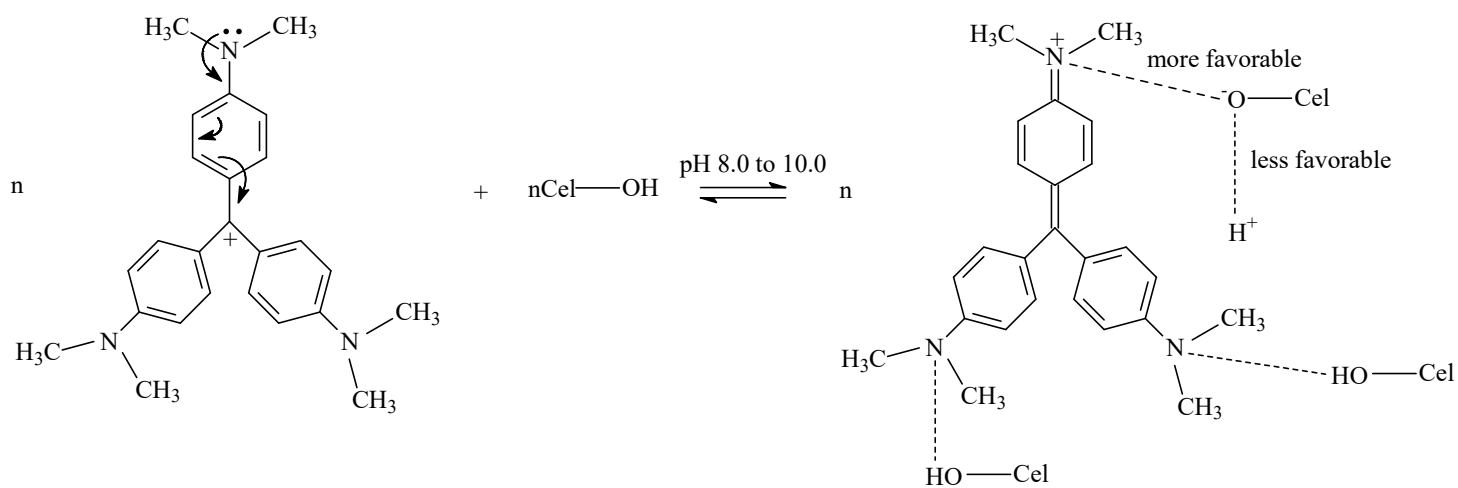

(5)

(ii)

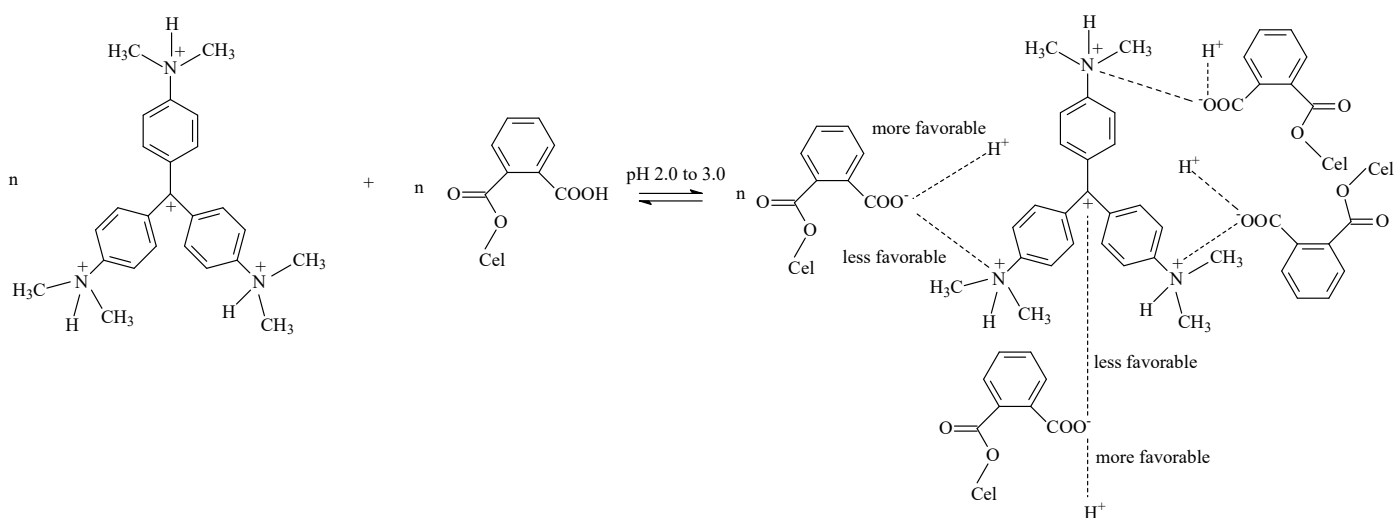

(1)

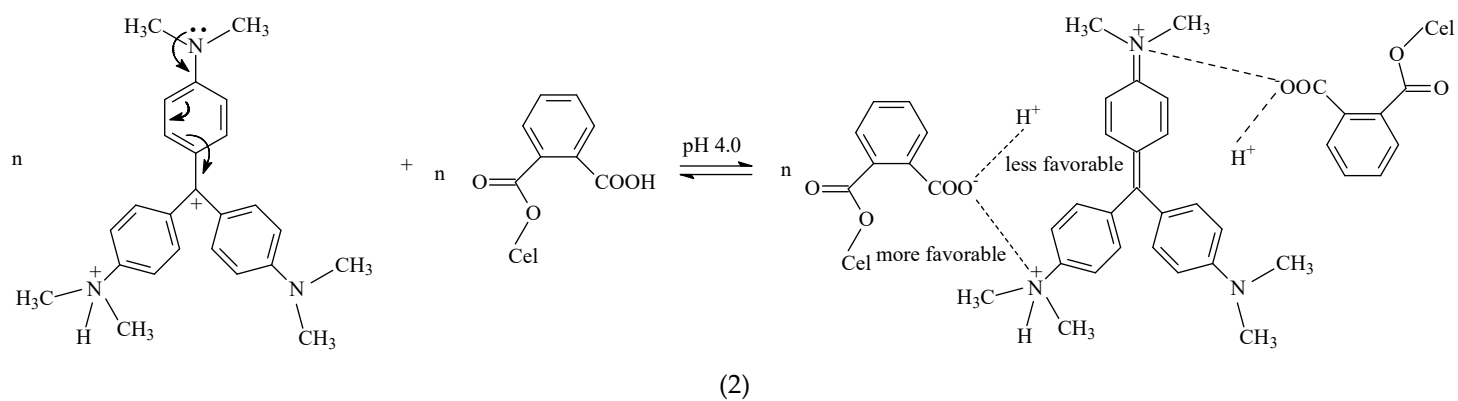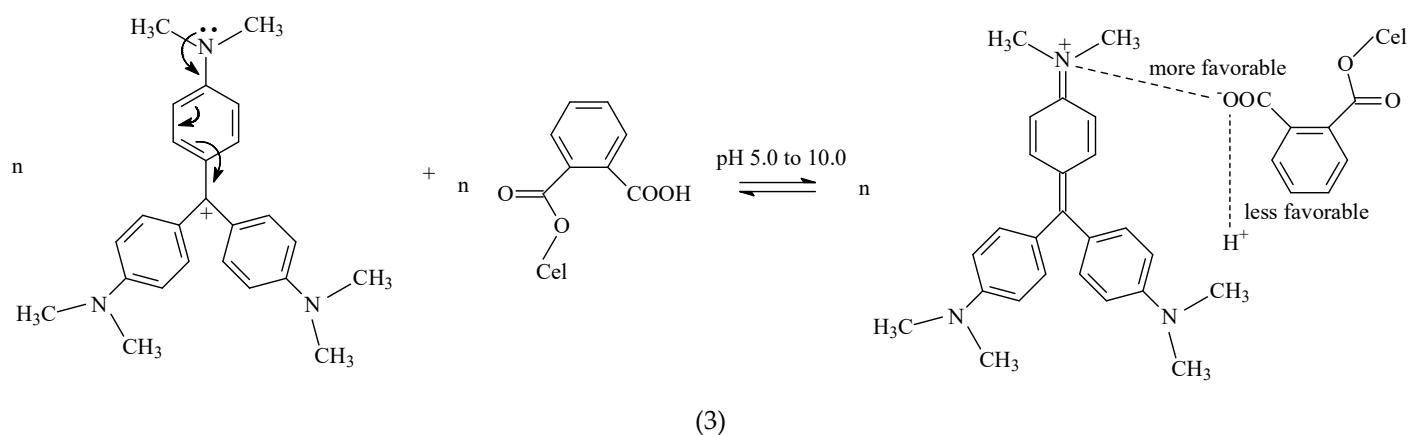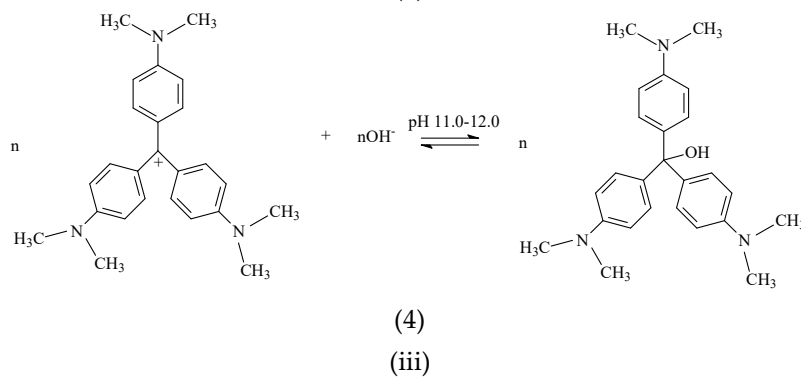

**Figure S1.** (i) Distribution of CV microspheres under different pHs. Scheme of adsorption process of CV in the (ii) Cel and (iii) PhCel under different pHs.

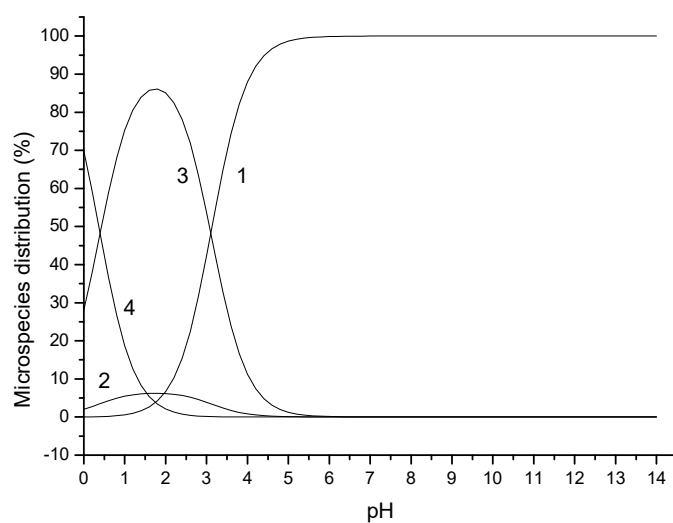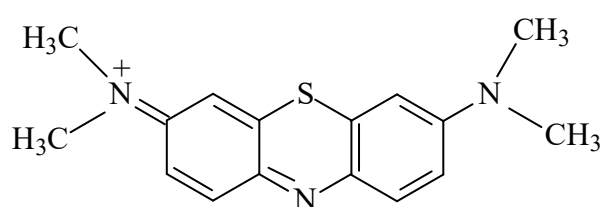

(1)

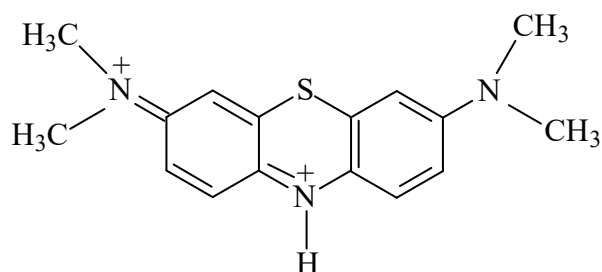

(2)

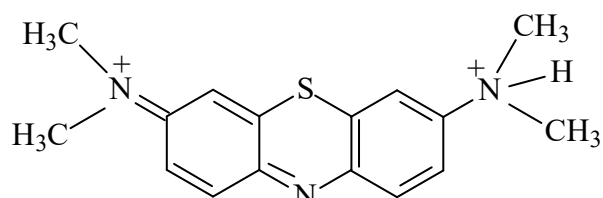

(3)

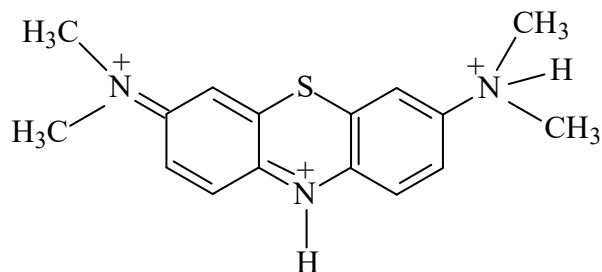

(4)

(i)

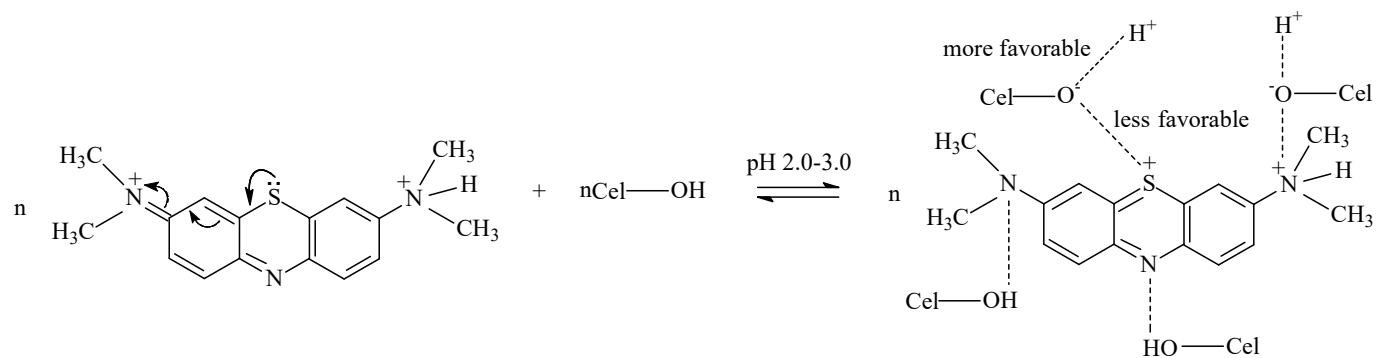

(1)

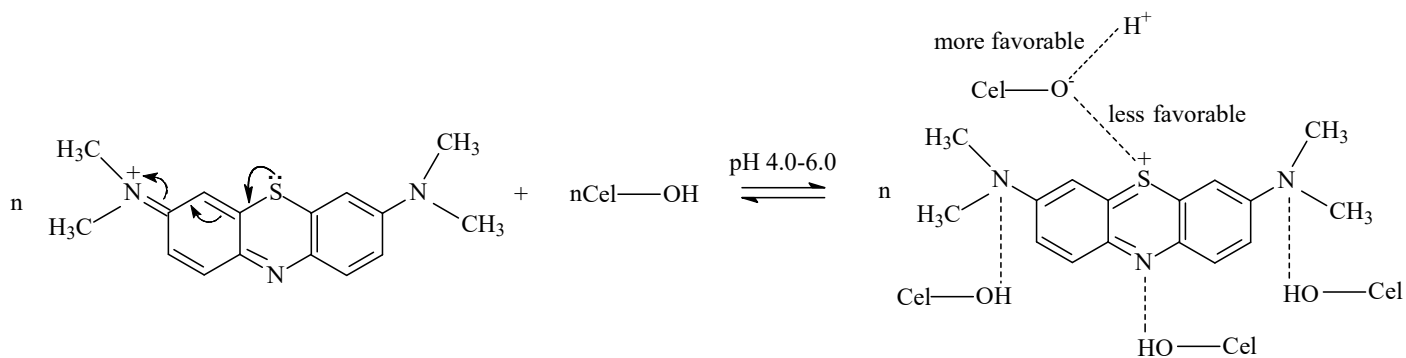

(2)

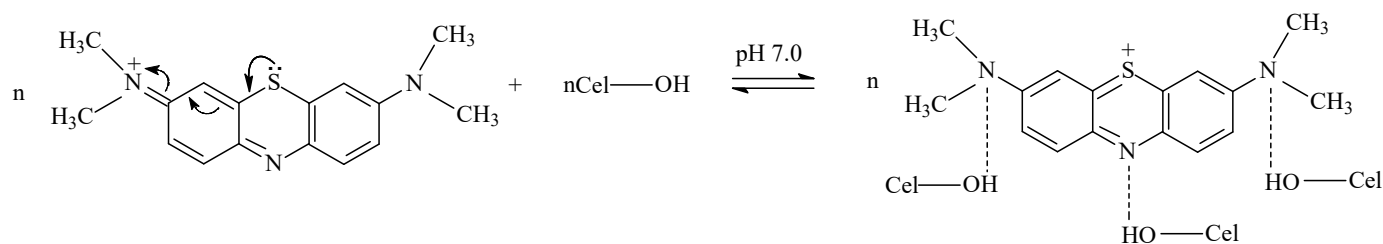

(3)

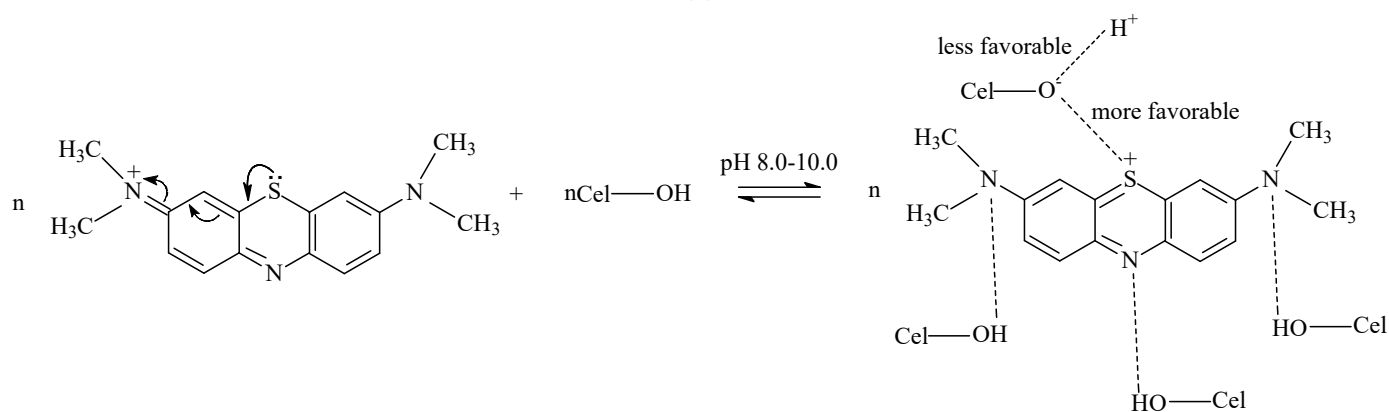

(4)

(ii)

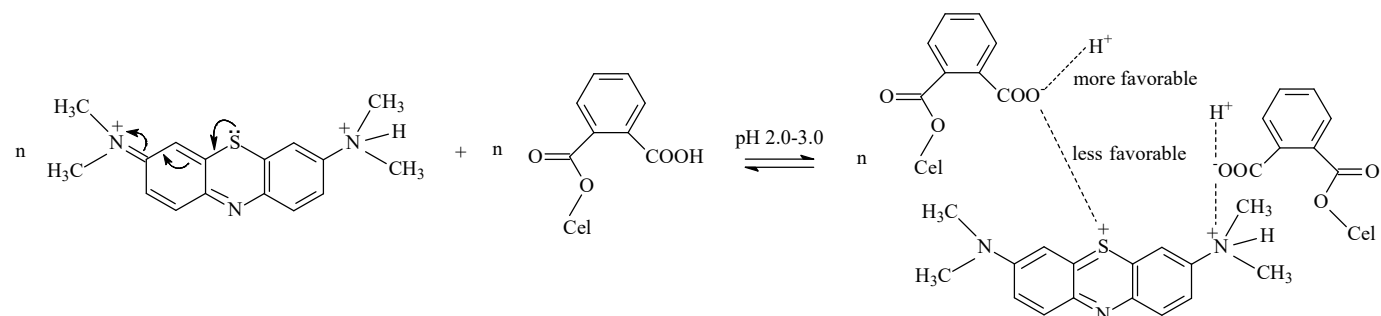

(1)

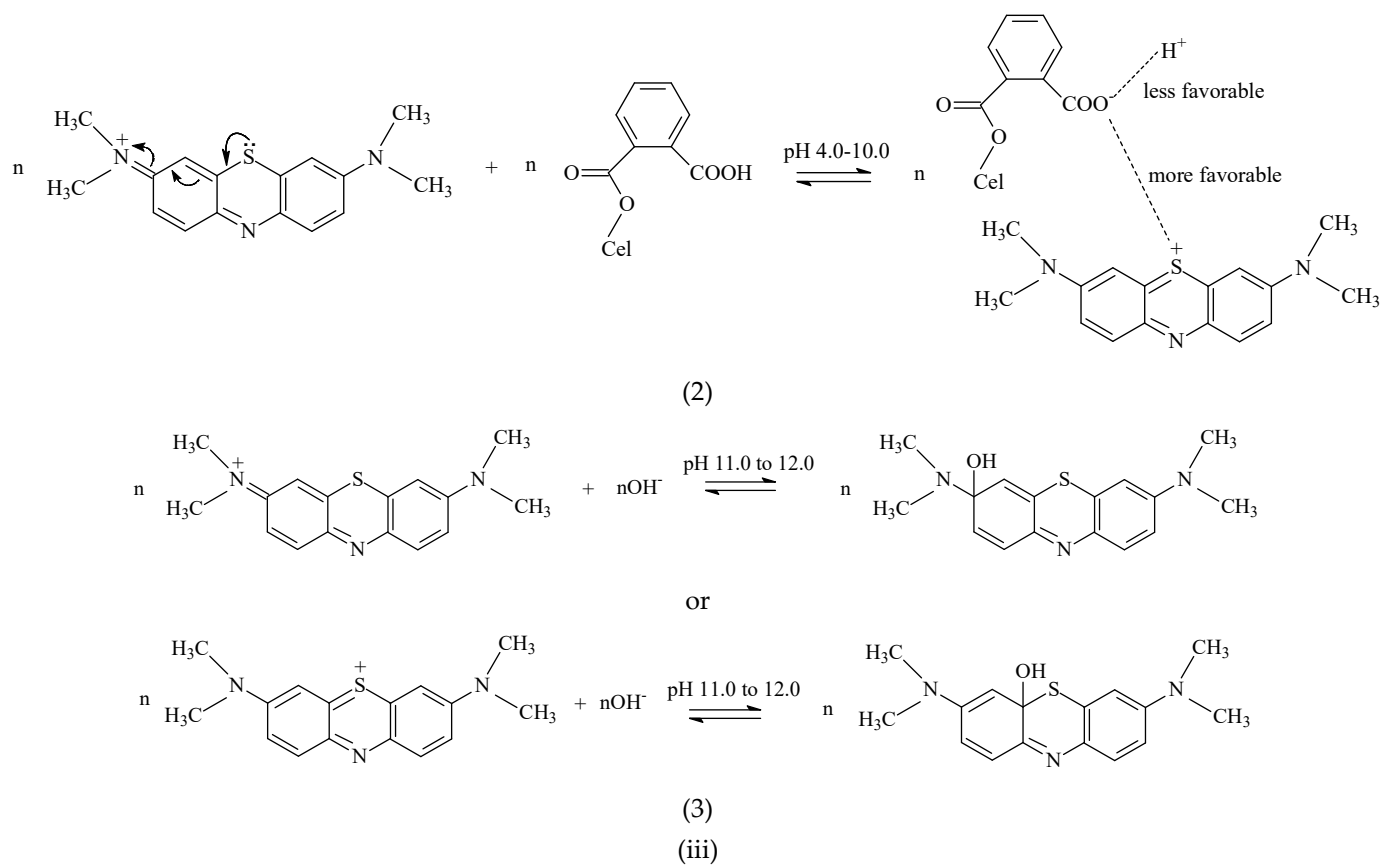

**Figure S2.** (i) Distribution of MB microspecies under different pHs. Scheme of adsorption process of MB in the (ii) Cel and (iii) PhCel under different pHs.



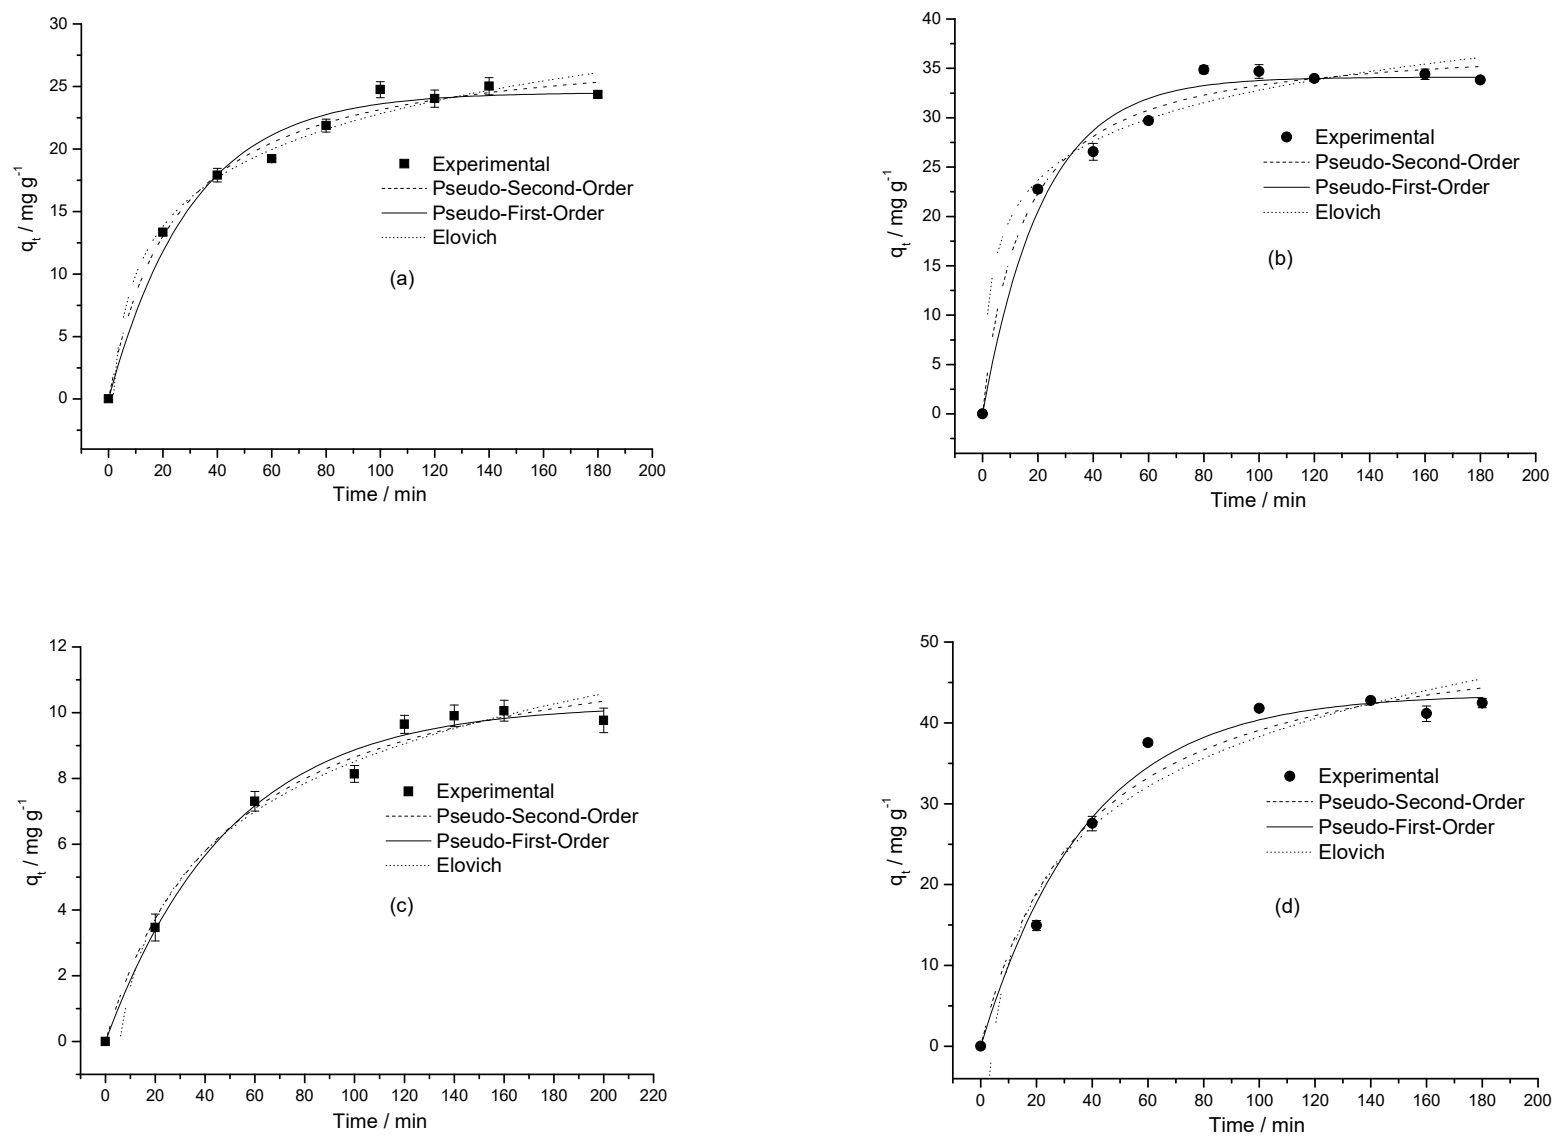

**Figure S3.** Effect of contact time on the adsorption of CV (a and b) and MB (c and d) onto Cel (- ■ -) or PhCel (- ● -) and the nonlinear adjustments of kinetic models.

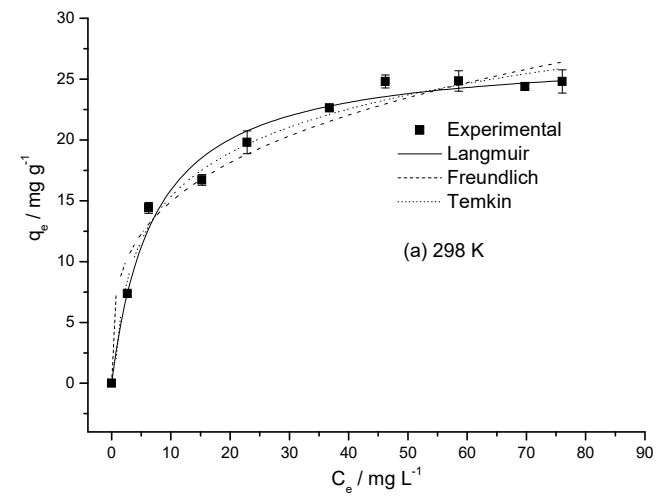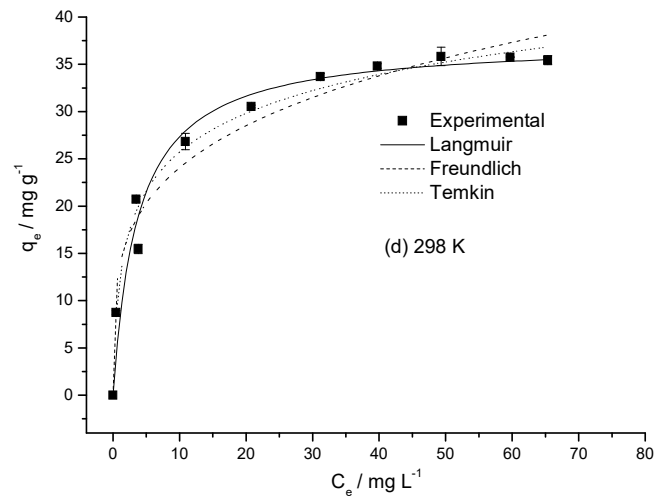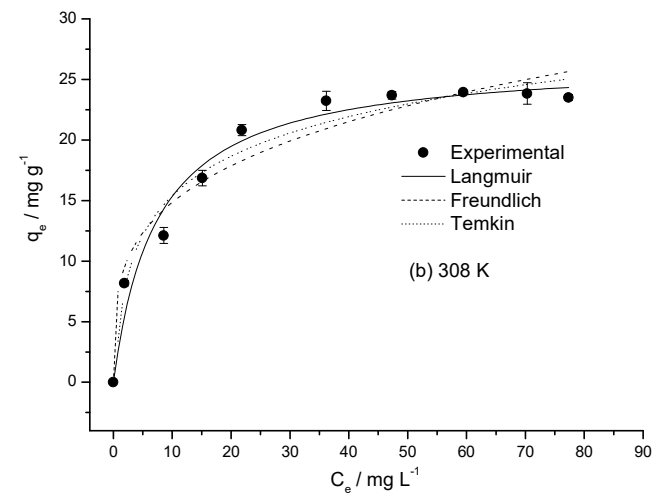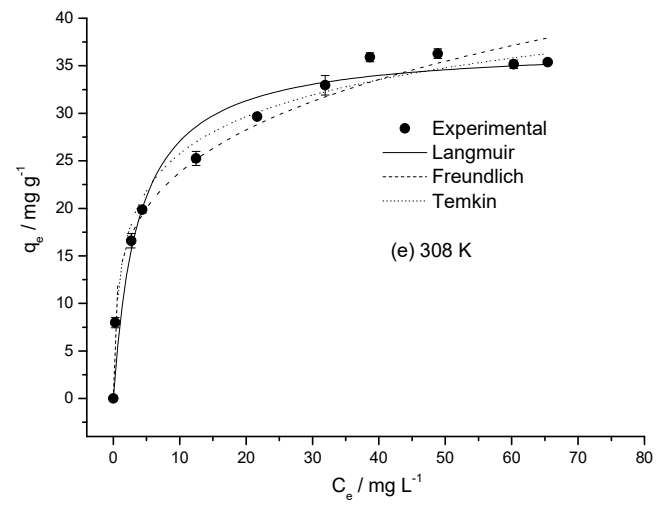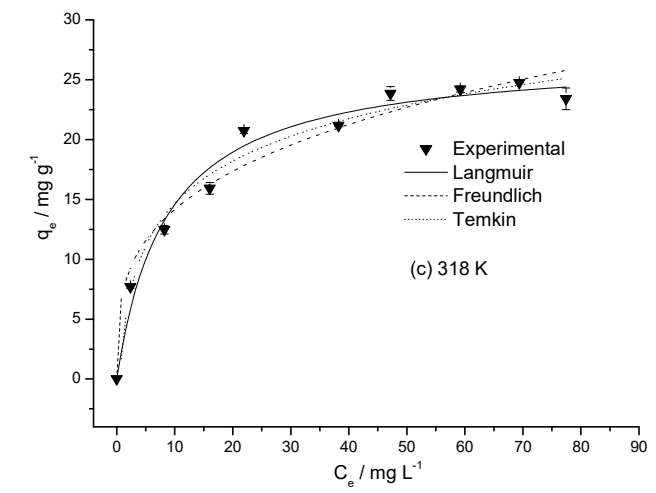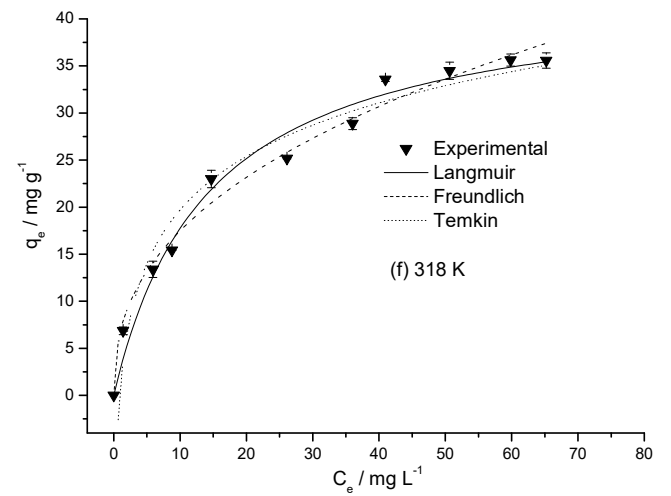

**Figure S4.** Effect of CV concentration on the adsorption process in the Cel (a–c) or PhCel (d–f) in different temperatures and the nonlinear adjustments of Isotherm models.

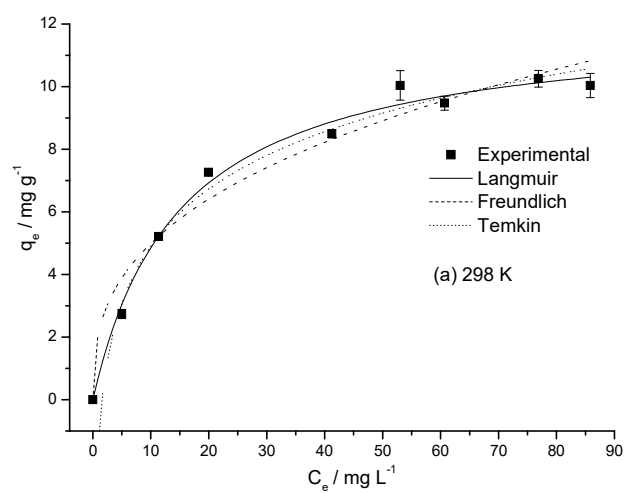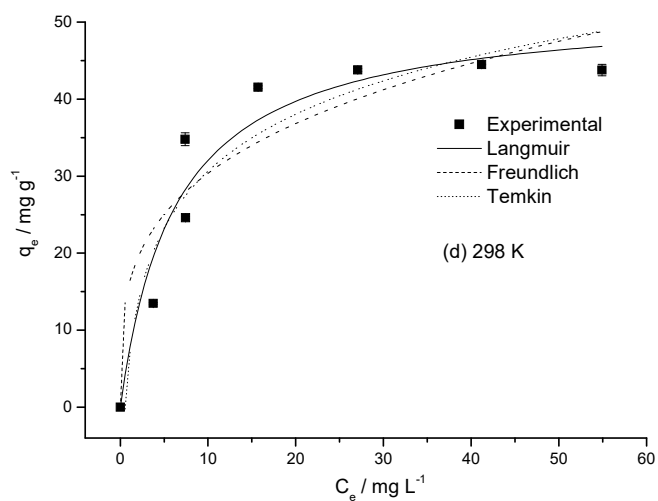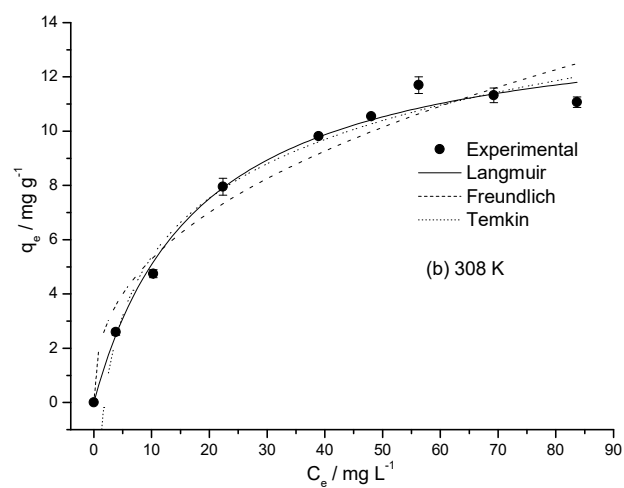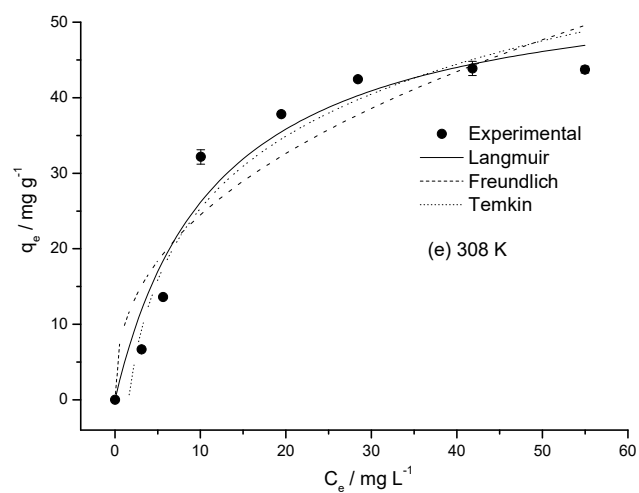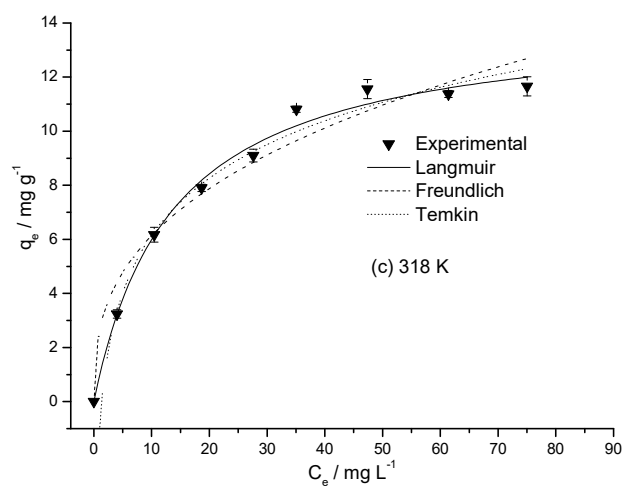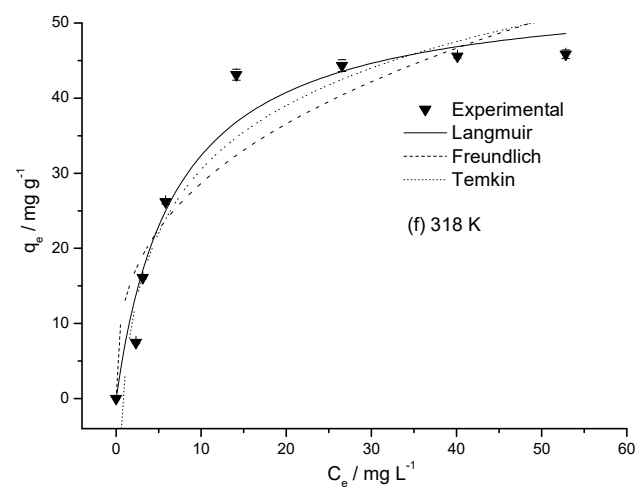

**Figure S5.** Effect of MB concentration on the adsorption process in the Cel (a–c) or PhCel (d–f) in different temperatures and the nonlinear adjustments of Isotherm models.
